# Supplementary material for: Minimal dynamical systems model of the Northern Hemisphere jet stream via embedding of climate data
Source: Copernicus journal article supplement (doi:10.5194/esd-10-555-2019), 2019-09-19
Supplement: Supplementary file 1 [file esd-10-555-2019-supplement.zip]

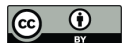

## *Supplement of*

# **Minimal dynamical systems model of the Northern Hemisphere jet stream via embedding of climate data**

**Davide Faranda et al.**

*Correspondence to:* Davide Faranda ([davide.faranda@lsce.ipsl.fr](mailto:davide.faranda@lsce.ipsl.fr))

- [esd-10-555-2019-supplement-title-page.pdf](#)
- [Supp\\_Video\\_hq.mp4](#)

The copyright of individual parts of the supplement might differ from the CC BY 4.0 License.
